1 **lncRNA-RMST functioned as a SOX2 transcription co-regulator to regulate miR-**  
2 **1251 in the progression of Hirschsprung's disease**

3  
4 Lingling Zhou<sup>2\*</sup>, Zhengke Zhi<sup>1\*</sup>, Pingfa Chen<sup>3\*</sup>, Zhonghong Wei<sup>1</sup>, Chunxia Du<sup>1</sup>, Binyu  
5 Wang<sup>1</sup>, Xiang Fang<sup>1</sup>, Weibing Tang<sup>1</sup>, Hongxing Li<sup>1</sup>

6  
7 <sup>1</sup>Department of Pediatric Surgery, Children's Hospital of Nanjing Medical University,  
8 Nanjing, 210008, China

9 <sup>2</sup>Soochow University Affiliated Children's Hospital, Suzhou, 215128, China

10 <sup>3</sup>Yancheng city NO.1 People's hospital, Yancheng, 224006, China

11  
12 \* These authors have contributed equally to this work

13 Correspondence to: Hongxing Li, email: [hx8817@njmu.edu.cn](mailto:hx8817@njmu.edu.cn)

14  
15  
16 **SUMMARY STATEMENT**

17 Hirschsprung disease (HSCR) is characterized by a deficit in enteric neurons,  
18 however, the underlying mechanism remains unclear. This study revealed the role of  
19 lnc-RMST during the occurrence of HSCR.

20  
21  
22 **ABSTRACT**

23 Hirschsprung's disease (HSCR) is a congenital disorder characterized by the absence  
24 of enteric neural crest cells (ENCCs). Non-coding RNAs including long non-coding  
25 RNAs (lncRNAs) and microRNAs (miRNAs) have been authenticated as important  
26 regulators of biological functions. We conducted a microarray analysis and found  
27 lncRNA Rhabdomyosarcoma 2-associated transcript (RMST) was down-regulated in  
28 the stenotic segment of HSCR patients. MiR-1251 is transcribed from the intron region  
29 of RMST and was also low-expressed. When the expression of RMST or miR-1251  
30 was reduced, the cell proliferation and migration were attenuated. However, RMST  
31 didn't affect the expression of miR-1251 directly found in this study. Through  
32 bioinformatic analysis, transcription factor SOX2 was predicted to bind to the promoter  
33 region of miR-1251 which was confirmed by CHIP assay. Herein, we demonstrated that  
34 RMST exerted as a co-regulator of SOX2 to regulate the expression of miR-1251.  
35 Furtherly, AHNAK was proved to be the target gene of miR-1251 in this study. Taken  
36 together, we revealed the role of RMST/SOX2/miR-1251/AHNAK pathway in the  
37 occurrence of Hirschsprung's disease and provided a potential therapeutic target for this  
38 disease.

39  
40 **Keywords:** Hirschsprung's disease, lncRNA-RMST, miR-1251, SOX2, AHNAK

45

46

47

## 1. INTRODUCTION

48

49 Hirschsprung disease (HSCR), a common enteric neuropathy, is characterized by the  
50 absence of gangliocytes in the distal colon(Jaroy et al., 2019; Sergi, 2015). During 5 to  
51 12 weeks of embryogenesis, enteric neural crest cells (ENCCs) failed to migrate and  
52 proliferate might cause this disease (Bergeron et al., 2013). HSCR usually attacks about  
53 1/5000 neonates, while the incidence rate of females is about a quarter of males. (Wester  
54 and Granstrom, 2017). Current etiological studies show that HSCR is a complicated  
55 disorder involving multiples genetic factors(McKeown et al., 2013). Genes including  
56 RET, GDNF, GFRA1, EDNRB and PHOX2B have been confirmed to be involved in  
57 HSCR (Tam, 2016; Zhao et al., 2019). However, these genes could only explain partly,  
58 so further research is needed.

59

60 With longer than 200 nucleotides, long noncoding RNAs (lncRNAs) are  
61 increasingly considered to be the main players in governing basic biological processes  
62 by affecting gene expression at nearly all levels.(Shen et al., 2019; Xu et al., 2020). As  
63 reported before, various lncRNAs can regulate cell proliferation and migration. For  
64 instance, lncRNA TPTEP1 could inhibit the non-small cell lung cancer (NSCLC) cells  
65 to proliferate through abating miR-328-5p expression(Cao et al., 2020). In addition, in  
66 renal cell carcinoma, lncRNA00312 attenuated cell proliferation and migration  
67 obviously(Zeng et al., 2020). However, the study about lncRNA functioned in HSCR  
68 is rarely reported.

69

70 In order to explore the role of lncRNA in the occurrence of HSCR, a microarray  
71 was conducted in this study, and we found lncRNA Rhabdomyosarcoma 2-Associated  
72 Transcript (RMST) was significantly low expressed in the aganglionic bowels  
73 compared with the normal ones. RMST has been discovered to be essential in neuronal  
74 differentiation(Cheng et al., 2020; Tang et al., 2015). According to a report, RMST  
75 promoted activation of microglial cells by activating TAK1-mediated NF- $\kappa$ B  
76 signaling(Sun et al., 2019). Considering the effects of RMST on nervous system and  
77 the low-expressed of RMST in HSCR, we aimed to reveal its roles during the procedure  
78 of HSCR. Furtherly, miR-1251 was transcribed from the same genomic site as RMST  
79 and was also low-expressed in HSCR diseased bowel. However, we found RMST didn't  
80 regulate its intron gene miR-1251 independently in this study. There may be other  
81 regulatory mechanisms to be explored.

82

83 Sex determining region Y (SRY)-box 2 (SOX2) functions a transcription factor is  
84 implicated in transcriptional regulation(Collignon et al., 1996; Schepers et al., 2002).  
85 It has also been discovered to regulate miRNAs expression(Liu et al., 2017).  
86 Interestingly, SOX2 is closely related to the nervous system, such as the terminal  
87 differentiation of postmitotic olfactory neurons was regulated by SOX2 directly  
(Alqadah et al., 2015). Through bioinformatics analysis, it was found SOX2 might

88 bind to the promoter of miR-1251. Numerous evidences have also indicated that the  
89 down-regulation of SOX2 attenuated cell growth and migration(Sannino et al., 2019;  
90 Schaefer and Lengerke, 2020). Thus, SOX2 probably be related to the development of  
91 neural crest cells during HSCR by regulating the expression of miR-1251.  
92 Furthermore, according to previous report, RMST could interact with SOX2 and then  
93 enhance its regulation on downstream genes(Ng et al., 2013). Therefore, we  
94 hypothesized that RMST might function as a SOX2 transcription co-regulator to  
95 regulate the downstream miR-1251 and participate in the proceeding of HSCR.

96

97

## 98 **2. MATERIALS AND METHODS**

99

### 100 **2.1 Clinical information**

101 This study was approved by the Institutional Ethics Committee of Nanjing Medical  
102 University (NJMU Birth Cohort), and the experiments were carried out according to  
103 approved guidelines. 32 stenotic colon tissues were collected from patients accepted  
104 radical operation of HSCR in Children's Hospital of Nanjing Medical University from  
105 January 2011 to August 2014. 32 controls matched with cases on age and gender were  
106 randomly picked out from isolated patients on account of intussusception or  
107 incarcerated and strangulated inguinal hernia without the ischemia or necrosis parts.  
108 Tissues were harvested and stored at  $-80^{\circ}\text{C}$  immediately after surgery. All HSCR  
109 patients were diagnosed through pathological analysis. Finally, written informed  
110 consent from all participants were obtained.

111

### 112 **2.2 Quantitative Real-time Polymerase Chain Reaction (qRT-PCR)**

113 To isolate total RNA from tissues and cells, Trizol reagent (Invitrogen Life  
114 Technologies Co, USA) was applied. QRT-PCR was employed to detect RMST, miR-  
115 1251 and AHNAK expression. TaqMan® MicroRNA Assays (Applied Biosystems,  
116 USA) was used to test miR-1251 expression. GAPDH and U6 was applied as an internal  
117 control for mRNA and miRNA detection, respectively. Roche LightCycler480 (Roche,  
118 Switzerland) was used to perform qRT-PCR depending on the manufacturer's protocol.  
119 Primer sequences were showed in Table 1.

120

### 121 **2.3 Western Blotting**

122 RIPA lysis buffer (Beyotime, Shanghai, China) was applied to extract total proteins  
123 from colon tissues and cultured cells. BCA Protein Assay Kit (Beyotime, Shanghai,  
124 China) was used to detect protein concentration. The same amount of total proteins was  
125 isolated in 10% SDS-PAGE, transferred to PVDF membranes and then sealed for 1 h.  
126 At  $4^{\circ}\text{C}$ , primary antibodies were used for incubation overnight. Afterwards,  
127 corresponding secondary antibodies were added for 2 h at  $25^{\circ}\text{C}$ . Finally, the membranes  
128 were exposed via ECL and Western blot detection reagents (Thermo Fisher Scientific,  
129 MA, USA). Antibodies including anti-AHNAK (SC134252), anti-SOX2 (SC17320X)  
130 and anti-GAPDH (SC47724) were obtained from Santa Cruz (CA, USA). The

131 corresponding secondary antibodies were obtained from Beyotime (Shanghai, China).

132

#### 133 **2.4 Chromatin Immunoprecipitation (ChIP)**

134 By using ChIP Assay Kit (Thermo Fisher Scientific, Shanghai, China), ChIP was  
135 implemented in accordance with the operating instructions. Firstly, cross-linked  
136 chromatin was sonicated into around 200 bp to 1000 bp fragments. Anti-SOX2 was  
137 used to immunoprecipitate the chromatin. Goat immunoglobulin G (IgG, ab172730,  
138 Abcam, USA) was applied to be the negative control. PCR was performed using SYBR  
139 Green Mix (Takara Bio, Japan). The primer sequences were shown in Table 1.

140

#### 141 **2.5 Cell culture and transfection**

142 SH-SY5Y and 293T cell lines were acquired from ATCC. Cells were cultured at  
143 37°C, 5% CO<sub>2</sub> condition using DMEM (Hyclone, USA) culture medium containing 10%  
144 FBS, 100 U/mL penicillin, and 100 µg/mL streptomycin. The inhibitor of miR-1251,  
145 siRNA of RMST, SOX2 and the corresponding negative controls were synthesized by  
146 Genechem (Shanghai, China). Transfection experiments were conducted by using  
147 Lipofectamine 2000 Reagent (Invitrogen Life Technologies Co, USA).

148

#### 149 **2.6 Cell proliferation assay**

150 To test the cell viability, cell counting kit-8 (CCK-8, Dojindo, Japan) was employed.  
151 After transfection, cells were cultured in 96-well plates for 24-48 h and then cells were  
152 incubated with CCK-8 reagent the for 1-2 h. Eventually, the OD value at 450 nm was  
153 detected by the TECAN infinite M200 Multimode microplate reader (Tecan, Mechelen,  
154 Belgium). Each assay was conducted independently in triplicate.

155

#### 156 **2.7 Cell migration assay**

157 Transwell chambers were placed above a 24-well plate. After transfection around  
158 24-48h, cells were resuspended with serum-free medium to  $1 \times 10^6$  cells/ml. About  
159 100µl cell suspension was seeded to the upper chamber. 500µL of complete culture  
160 medium containing FBS was added to the lower chamber. 24-48h later, 4%  
161 paraformaldehyde was applied to fix the lower chamber cells and then crystal violet  
162 staining solution was used to stain cells. Cells migrated to the lower chamber were  
163 counted and imaged using an inverted microscope ( $\times 20$ ). All experiments were  
164 conducted in triplicate.

165

#### 166 **2.8 Dual-luciferase reporter assay**

167 The predicted 3'-UTR sequence of AHNAK binding to miR-1251 and the mutated  
168 sequence were inserted into the pGL3 promoter vector (Genechem, Shanghai, China)  
169 named pGL3-AHNAK-WT and pGL3-AHNAK-MUT. For reporter assay, cells were  
170 planted into 24-well plates and transfected with 100ng of pGL3-AHNAK-WT and  
171 pGL3-AHNAK-MUT, 50nM miR-1251 mimics and negative control using  
172 Lipofectamine 2000. Renilla luciferase vector pRL-SV40 (5 ng) was transfected into  
173 cells as control. Based on the obtained ratio, the activation degree of target reporter  
174 genes in different sample was compared.

175

## 176 **2.9 Statistical analysis**

177 GraphPad Prism 7.0 (GraphPad Software, USA) was adopted to analyze data.  
178 Between two groups, *t*-test was applied to determine the statistically significant  
179 differences, while the comparison among multiple groups was performed via one-way  
180 ANOVA. All data were presented as the mean  $\pm$  SEM.  $P < 0.05$  was considered as  
181 statistically significant.

182

## 183 **3. RESULTS**

184

### 185 **3.1 Down-regulation of RMST and miR-1251 in HSCR patients**

186 To verify the expression levels of RMST, qRT-PCR was employed. RMST was  
187 markedly down-regulated in ganglia-free intestinal segment compared with normal  
188 controls as result showed (Fig. 1A). In order to detect whether RMST could affect cell  
189 migration and proliferation, Transwell and CCK8 assays were conducted. As the results  
190 showed, after transfected with RMST siRNA, the migrated and proliferated cells were  
191 obviously fewer than the normal control in both cell lines. (Fig. 1B). We also discovered  
192 the RMST intronic miR-1251 was down-regulated in aganglionic tracts (Fig. 1C).  
193 When cells transfected with miR-1251 inhibitor, the cell migration and proliferation  
194 was attenuated (Fig. 1D).

### 195 **3.2 miR-1251 was transcriptionally regulated by SOX2**

196 Because miR-1251 is transcribed from the same genomic locus as RMST, we  
197 suspected that RMST might influence the expression level of miR-1251. To verify it,  
198 we knocked down RMST in SH-SH-SY5Y and 293T cells and then measured miR-  
199 1251 levels by qRT-PCR, however, there was no significant changes on miR1251  
200 expression level in both cell lines, indicating that RMST was not a precursor transcript  
201 for it (Fig. S1 A). Furtherly, we employed bioinformatics approach Promoter Scan to  
202 predict the transcription promoter of miR-1251. SOX2 was predicted to bind with the  
203 2kbp upstream promoter region of miR-1251 (Fig. S1 F). To confirm the combinative  
204 relationship between SOX2 and miR-1251, ChIP experiment was performed in the  
205 293T cells. The result confirmed that SOX2 could bind to the promoter region of miR-  
206 1251 (Fig. 2A). Furtherly, when we abated the level of SOX2, miR-1251 was down-  
207 regulated obviously (Fig. 2B). Additionally, SOX2 was found down-regulated at  
208 mRNA and protein levels in HSCR patients than normal controls. (Fig. 2C, D). Based  
209 on this, we supposed that SOX2 influenced cell migration and proliferation by  
210 regulating miR-1251. As expected, when cells were transfected with SOX2 siRNA, cell  
211 proliferation and migration was attenuated, while upregulating miR-1251 could reverse  
212 it partly (Fig. 2E-G).

213

### 214 **3.3 RMST functioned as a co-regulator of SOX2**

215 As reported before, RMST could also combine with SOX2 and then enhanced the  
216 transcriptional function of SOX2. In this study, we demonstrated that RMST could bind  
217 with SOX2 using RIP assay (Fig. 3A). Therefore, we forecasted that miR-1251 was

218 transcriptionally regulated by SOX2 and RMST could strengthen this effect. When we  
219 knocked down the expression of SOX2 and both SOX2 and RMST in 293T cell,  
220 respectively, the expression of miR-1251 was detected. As expected, miR-1251 was  
221 down-regulated after cells transfected with SOX2 siRNA and was much lower in cells  
222 co-transfected with RMST siRNA and SOX2 siRNA (Fig. 3B). So, whether RMST  
223 exerted its roles through SOX2/miR-1251 axis? Through CCK-8 and Tranwell assays,  
224 we found that when the expression of RMST and SOX2 were both knocked down, the  
225 cell proliferation and migration were more weakened than just down-regulated RMST  
226 or SOX2 alone. Meanwhile, the upregulation of miR-1251 partly reversed the co-  
227 function of si-RMST and si-SOX2 (Fig. 3C, D). These results revealed that RMST  
228 might function via acting as a co-regulator of SOX2 to regulate downstream gene miR-  
229 1251.

### 230 **3.4 AHNAK was the target gene of miR-1251**

231 To predict the downstream target gene of miR-1251, bioinformatical analysis was  
232 employed and we found miR-1251 might bind to the 3'UTR of AHNAK (Fig. 4A). As  
233 dual-luciferase reporter assay showed, compared with the control group, the luciferase  
234 activity was significantly decreased when cells co-transfected with miR-1251 mimics  
235 and pGL3-AHNAK-WT plasmids demonstrating the relationship between miR-1251  
236 and AHNAK (Fig. 4B). Furtherly, miR-1251 inhibitor was transfected in 293T cells.  
237 After 24 hours, AHNAK mRNA and protein levels were found up-regulated in 293T  
238 cells (Fig. 4C, D). By qRT-PCR, AHNAK was demonstrated up-regulated remarkably  
239 in aganglionic tract compared with normal controls (Fig. 4E). The protein level of  
240 AHNAK was detected furtherly, and was fit with its mRNA expression level (Fig. 4F).  
241 Meanwhile, we explored whether miR-1251 regulated cell function through AHNAK.  
242 As rescue experiment results showed, the reduction of AHNAK could partly reverse  
243 the influence of miR-1251 inhibitor on both cell migration and proliferation (Fig. 4G-  
244 I).

### 246 **3.5 RMST played as a SOX2 transcription co-regulator to inhibit miR-1251 and 247 raise AHNAK expression**

248 Combined with above results, we presumed that RMST enhanced the regulation of  
249 SOX2 to miR-1251 and then promoted the expression of AHNAK, finally, affecting  
250 the proliferation and migration of neural cells. Firstly, the mRNA and protein  
251 expression of AHNAK was measured via qRT-PCR and western blot in every group  
252 respectively. There was no significant difference found in AHNAK expression between  
253 the RMST low expression group and the control group, however, the mRNA and  
254 protein expression of AHNAK was increased after SOX2 was down regulated.  
255 Furthermore, the expression of AHNAK was much lower in "RMST siRNA+SOX2  
256 siRNA" group than in "SOX2 siRNA" group. which confirmed that RMST, as a SOX2  
257 transcription co regulatory factor, upregulated the expression of AHNAK (Fig. 5A, B).  
258 In order to further confirmed the mechanism of its function through AHNAK, RMST  
259 low expression group, SOX2 low expression group, RMST low expression + SOX2  
260 low expression group, RMST low expression + SOX2 low expression + AHNAK low

261 expression group and control group were set up. CCK-8 and Transwell assays were  
262 applied to detect cell proliferation and migration abilities of every group. The results  
263 showed that the combined inhibition of both RMST and SOX2 low expression on cell  
264 proliferation and migration could be partially alleviated by simultaneously  
265 downregulating the expression of AHNAK (Fig. 5C, D).

266

267

268

269

#### 270 **4. DISCUSSION**

271

272 Non coding RNA (ncRNA) has been once considered as the "noise" of human genome  
273 transcription, which has no biological effects. With the development of high-throughput  
274 sequencing technology and in-depth research, more and more ncRNAs, especially  
275 miRNA and lncRNA, have been found to play very important roles in epigenetic  
276 regulation and take part in the occurrence and development of multiple  
277 diseases(Moradimotlagh et al., 2019; Pan et al., 2020; Tai et al., 2020). Although there  
278 have been some reports about ncRNAs in HSCR, its mode of action and mechanism  
279 still need further study(Gunadi et al., 2019; Zhi et al., 2018). In this study, our research  
280 team detected that in the stenosis tract of HSCR patients, RMST and miR-1251 were  
281 down-regulated apparently. MiR-1251 was firstly demonstrated as a potential  
282 prognostic markers in head and neck squamous cell carcinoma(Hui et al., 2016). But  
283 there're few studies about miR-1251 in other diseases. Herein, it was initially found  
284 that the cell proliferation and migration was significantly inhibited after the expression  
285 of RMST or miR-1251 was reduced, indicating that RMST and miR-1251 might play a  
286 certain role in the pathogenesis of HSCR. Although miR-1251 derived from the intron  
287 region of RMST, we found RMST did not regulate the expression of miR-1251  
288 independently. Whether there's other regulatory mechanism? We explored it in the next  
289 step.

290

291 According to the bioinformatical analysis, we found SOX2, a transcription factor,  
292 probably bind to the promoter region of miR-1251. ChIP assay then confirmed it. SOX  
293 family, such as SOX10 has been proved to be related to the pathogenesis of  
294 HSCR(Southard-Smith et al., 1998), but there are few reports about the role and  
295 mechanism of SOX2 in the occurrence of HSCR. As reported before, SOX2 could  
296 regulate the proliferation and differentiation of peripheral nerve cells in the peripheral  
297 nervous system, (Wakamatsu et al., 2004). A recent study revealed that SOX2 gene was  
298 involved in the development of embryonic neural tube and neural crest cells(Iida et al.,  
299 2020). When knocked out SOX2 gene, the number of neurons in the ganglion derived  
300 from neural crest of mouse embryo decreased obviously, indicating SOX2 probably  
301 also play an important role in the progression of HSCR (Cimadamore et al., 2011).  
302 Furtherly, SOX2 could bind to bivalently marked promoters of poised pro-neural and  
303 neurogenic genes, and then activated neuronal differentiation appropriately (Amador-  
304 Arjona et al., 2015). These findings all indicated the important role of SOX2 played in

305 the nervous system. In addition, over-expressed SOX2 promoted tumor progression by  
306 enhancing the abilities of cell proliferation and migration(Liu et al., 2017; Wang et al.,  
307 2017). Herein, we demonstrated SOX2 was significantly down-regulated in aganglionic  
308 tract and the following experiments showed the lowly expressed SOX2 might be  
309 involved in the occurrence of HSCR by repressing neural crest cells' proliferation and  
310 migration via regulating miR-1251.

311

312 LncRNAs could bind with some proteins to influence their function. For example,  
313 lncRNA EPIC1 accelerated the regulation of MYC on downstream genes through  
314 combing with MYC(Wang et al., 2018). In this study, RIP results showed that RMST  
315 and SOX2 had binding relationship, which provided a basis for RMST as a transcription  
316 co-regulator of SOX2 to regulate miR-1251. We also found that the inhibition on cell  
317 proliferation and migration was more obvious in knocked down both RMST and SOX2  
318 than abated RMST or SOX2 expression alone. Furtherly, raised miR-1251 partially  
319 alleviated the combined effect of RMST and SOX2 which confirmed that RMST might  
320 play a role as a transcription co-regulatory factor of SOX2 by enhancing the regulation  
321 of SOX2 on miR-1251. Previous studies about lncRNAs in HSCR have mostly focused  
322 on the mechanism of competitive endogenous RNA (ceRNA) (Li et al., 2018; Su et al.,  
323 2018). This research, however, firstly explored the mechanism of HSCR from the  
324 perspective of lncRNA binding protein, and expanded a new direction of HSCR  
325 research.

326

327 MiRNAs generally perform their functions by degrading their target genes(Chopra  
328 et al., 2020). It was confirmed in this study that AHNAK was the target gene of miR-  
329 1251 through the analysis of biological information and the experiment of dul-  
330 luciferase reporter assay. AHNAK, as a kind of scaffold protein, is involved in the  
331 regulation of  $Ca_2^+$  channel and the formation of actin cytoskeleton, which has a  
332 profound impact on cell migration function(Lee et al., 2014). For example, it has been  
333 found that AHNAK is significantly under-expressed in breast cancer and *in vitro*  
334 experimental results show that the proliferation and migration ability of cells is  
335 significantly impaired after the up-regulation of AHNAK(Chen et al., 2017). Owing to  
336 the expression level of AHNAK in the stenosis tract of HSCR was significantly higher  
337 than control ones, whether miR-1251 functioned through AHNAK was investigated in  
338 this study. As expected, miR-1251 inhibited cell proliferation and migration, but  
339 improved AHNAK expression could partly reverse it.

340 Thus, whether RMST, as a co transcription regulator of SOX2, up-regulated the  
341 expression of AHNAK by regulating miR-1251 and exerted its roles through  
342 RMST/SOX2/miR-1251/AHNKA axis needed deeply study. As results showed, none  
343 significant difference of AHNAK expression between si-RMST group and control  
344 group was found, which also confirmed that RMST did not regulate miR-1251 alone.  
345 But the expression of AHNAK improved more a lot when co-reduced RMST and SOX2  
346 than only down-regulating SOX2. Meanwhile, the results of cell function experiments  
347 revealed that the down-regulation of AHNAK partially reversed the inhibition of RMST  
348 and SOX2 simultaneous down-regulation on cell proliferation and migration, indicating



349 that RMST, as a co-transcription regulator of SOX2, could affect the expression of  
350 downstream gene AHNAK through miR-1251 and then influence neural cells'  
351 migration and proliferation.

352

353 To sum up, this study revealed that RMST functioned as a co-transcription regulator  
354 of SOX2 to upregulate the expression of downstream gene AHNAK by strengthening  
355 the regulation of SOX2 on miR-1251 for the first time, which probably be involved in  
356 the pathogenesis of HSCR. The discovery of RMST/SOX2/miR-1251/AHNAK could  
357 be helpful for the targeted therapy of HSCR in the future.

358 However, this study. still existed some deficiencies We discovered that decreased  
359 the expression of RMST alone could also inhibit cell proliferation and migration,  
360 whether RMST has other regulation pattern needs further study. In addition, due to the  
361 animal model of HSCR is hard to be established, this study is not supported by *in vivo*  
362 experiments, though we're trying to overcome this shortage to make our study more  
363 persuasive.

364

365

366

## 367 **ACKNOWLEDGMENTS**

368

369 We thank Dr. Jie Zhang, Xiaofeng Lv, Weiwei Jiang, Huan Chen, Wei Li, Changgui  
370 Lu (Children's Hospital of Nanjing Medical University) for sample collection. This  
371 work was supported by the Natural Science Foundation of China (NSFC 81701493).

372

## 373 **FUNDING**

374

375 This work was supported by the Natural Science Foundation of China (NSFC  
376 81701493).

377

## 378 **ETHICS APPROVAL AND CONSENT TO PARTICIPATE**

379

380 This study was approved by the Institutional Ethics Committee of Nanjing Medical  
381 University (NJMU Birth Cohort), and the experiments were conducted in accordance  
382 with the principles of the Declaration of Helsinki. All parents of patients had provided  
383 written informed consent in the study.

384

## 385 **COMPETING INTERESTS**

386

387 The authors declare that they have no competing interests.

388

389

390

391

392

393 **REFERENCES**

- 394 **Alqadah, A., Hsieh, Y. W., Vidal, B., Chang, C., Hobert, O. and Chuang, C. F.** (2015).  
395 Postmitotic diversification of olfactory neuron types is mediated by differential activities of the HMG-  
396 box transcription factor SOX-2. *EMBO J* **34**, 2574-89.
- 397 **Amador-Arjona, A., Cimadamore, F., Huang, C. T., Wright, R., Lewis, S., Gage, F. H. and**  
398 **Terskikh, A. V.** (2015). SOX2 primes the epigenetic landscape in neural precursors enabling proper gene  
399 activation during hippocampal neurogenesis. *Proc Natl Acad Sci U S A* **112**, E1936-45.
- 400 **Bergeron, K. F., Silversides, D. W. and Pilon, N.** (2013). The developmental genetics of  
401 Hirschsprung's disease. *Clin Genet* **83**, 15-22.
- 402 **Cao, F., Wang, Z., Feng, Y., Zhu, H., Yang, M., Zhang, S. and Wang, X.** (2020). lncRNA  
403 TPTEP1 competitively sponges miR3285p to inhibit the proliferation of nonsmall cell lung cancer cells.  
404 *Oncol Rep.*
- 405 **Chen, B., Wang, J., Dai, D., Zhou, Q., Guo, X., Tian, Z., Huang, X., Yang, L., Tang, H. and**  
406 **Xie, X.** (2017). AHNAK suppresses tumour proliferation and invasion by targeting multiple pathways in  
407 triple-negative breast cancer. *J Exp Clin Cancer Res* **36**, 65.
- 408 **Cheng, H., Sun, M., Wang, Z. L., Wu, Q., Yao, J., Ren, G. and Sun, X. L.** (2020). LncRNA  
409 RMST-mediated miR-107 transcription promotes OGD-induced neuronal apoptosis via interacting with  
410 hnRNPK. *Neurochem Int* **133**, 104644.
- 411 **Chopra, N., Wang, R., Maloney, B., Nho, K., Beck, J. S., Pourshafie, N., Niculescu, A., Saykin,**  
412 **A. J., Rinaldi, C., Counts, S. E. et al.** (2020). MicroRNA-298 reduces levels of human amyloid-beta  
413 precursor protein (APP), beta-site APP-converting enzyme 1 (BACE1) and specific tau protein moieties.  
414 *Mol Psychiatry.*
- 415 **Cimadamore, F., Fishwick, K., Giusto, E., Gnedeva, K., Cattarossi, G., Miller, A., Pluchino,**  
416 **S., Brill, L. M., Bronner-Fraser, M. and Terskikh, A. V.** (2011). Human ESC-derived neural crest  
417 model reveals a key role for SOX2 in sensory neurogenesis. *Cell Stem Cell* **8**, 538-51.
- 418 **Collignon, J., Sockanathan, S., Hacker, A., Cohen-Tannoudji, M., Norris, D., Rastan, S.,**  
419 **Stevanovic, M., Goodfellow, P. N. and Lovell-Badge, R.** (1996). A comparison of the properties of  
420 Sox-3 with Sry and two related genes, Sox-1 and Sox-2. *Development* **122**, 509-20.
- 421 **Gunadi, Budi, N. Y. P., Kalim, A. S., Santiko, W., Musthofa, F. D., Iskandar, K. and Makhmudi,**  
422 **A.** (2019). Aberrant expressions of miRNA-206 target, FN1, in multifactorial Hirschsprung disease.  
423 *Orphanet J Rare Dis* **14**, 5.
- 424 **Hui, L., Wu, H., Yang, N., Guo, X. and Jang, X.** (2016). Identification of prognostic microRNA  
425 candidates for head and neck squamous cell carcinoma. *Oncol Rep* **35**, 3321-30.
- 426 **Iida, H., Furukawa, Y., Teramoto, M., Suzuki, H., Takemoto, T., Uchikawa, M. and Kondoh,**  
427 **H.** (2020). Sox2 gene regulation via the D1 enhancer in embryonic neural tube and neural crest by the  
428 combined action of SOX2 and ZIC2. *Genes Cells* **25**, 242-256.
- 429 **Jaroy, E. G., Acosta-Jimenez, L., Hotta, R., Goldstein, A. M., Emblem, R., Klungland, A. and**  
430 **Ougland, R.** (2019). "Too much guts and not enough brains": (epi)genetic mechanisms and future  
431 therapies of Hirschsprung disease - a review. *Clin Epigenetics* **11**, 135.
- 432 **Lee, I. H., Sohn, M., Lim, H. J., Yoon, S., Oh, H., Shin, S., Shin, J. H., Oh, S. H., Kim, J., Lee,**  
433 **D. K. et al.** (2014). Ahnak functions as a tumor suppressor via modulation of TGFbeta/Smad signaling  
434 pathway. *Oncogene* **33**, 4675-84.
- 435 **Li, Y., Zhou, L., Lu, C., Shen, Q., Su, Y., Zhi, Z., Wu, F., Zhang, H., Wen, Z., Chen, G. et al.**  
436 (2018). Long non-coding RNA FAL1 functions as a ceRNA to antagonize the effect of miR-637 on the

- 437 down-regulation of AKT1 in Hirschsprung's disease. *Cell Prolif* **51**, e12489.
- 438 **Liu, K., Xie, F., Gao, A., Zhang, R., Zhang, L., Xiao, Z., Hu, Q., Huang, W., Huang, Q., Lin,**  
439 **B. et al.** (2017). SOX2 regulates multiple malignant processes of breast cancer development through the  
440 SOX2/miR-181a-5p, miR-30e-5p/TUSC3 axis. *Mol Cancer* **16**, 62.
- 441 **McKeown, S. J., Stamp, L., Hao, M. M. and Young, H. M.** (2013). Hirschsprung disease: a  
442 developmental disorder of the enteric nervous system. *Wiley Interdiscip Rev Dev Biol* **2**, 113-29.
- 443 **Moradimotlagh, A., Arefian, E., Rezazadeh Valojerdi, R., Ghaemi, S., Jamshidi Adegani, F.**  
444 **and Soleimani, M.** (2019). MicroRNA-129 Inhibits Glioma Cell Growth by Targeting CDK4, CDK6,  
445 and MDM2. *Mol Ther Nucleic Acids* **19**, 759-764.
- 446 **Ng, S. Y., Bogu, G. K., Soh, B. S. and Stanton, L. W.** (2013). The long noncoding RNA RMST  
447 interacts with SOX2 to regulate neurogenesis. *Mol Cell* **51**, 349-59.
- 448 **Pan, J., Fang, S., Tian, H., Zhou, C., Zhao, X., Tian, H., He, J., Shen, W., Meng, X., Jin, X. et**  
449 **al.** (2020). lncRNA JPX/miR-33a-5p/Twist1 axis regulates tumorigenesis and metastasis of lung cancer  
450 by activating Wnt/beta-catenin signaling. *Mol Cancer* **19**, 9.
- 451 **Sannino, G., Marchetto, A., Ranft, A., Jabar, S., Zacherl, C., Alba-Rubio, R., Stein, S.,**  
452 **Wehweck, F. S., Kiran, M. M., Holting, T. L. B. et al.** (2019). Gene expression and  
453 immunohistochemical analyses identify SOX2 as major risk factor for overall survival and relapse in  
454 Ewing sarcoma patients. *EBioMedicine* **47**, 156-162.
- 455 **Schaefer, T. and Lengerke, C.** (2020). SOX2 protein biochemistry in stemness, reprogramming,  
456 and cancer: the PI3K/AKT/SOX2 axis and beyond. *Oncogene* **39**, 278-292.
- 457 **Schepers, G. E., Teasdale, R. D. and Koopman, P.** (2002). Twenty pairs of sox: extent, homology,  
458 and nomenclature of the mouse and human sox transcription factor gene families. *Dev Cell* **3**, 167-70.
- 459 **Sergi, C.** (2015). Hirschsprung's disease: Historical notes and pathological diagnosis on the  
460 occasion of the 100(th) anniversary of Dr. Harald Hirschsprung's death. *World J Clin Pediatr* **4**, 120-5.
- 461 **Shen, S., Wang, J., Zheng, B., Tao, Y., Li, M., Wang, Y., Ni, X., Suo, T., Liu, H., Liu, H. et al.**  
462 (2019). LINC01714 Enhances Gemcitabine Sensitivity by Modulating FOXO3 Phosphorylation in  
463 Cholangiocarcinoma. *Mol Ther Nucleic Acids* **19**, 446-457.
- 464 **Southard-Smith, E. M., Kos, L. and Pavan, W. J.** (1998). Sox10 mutation disrupts neural crest  
465 development in Dom Hirschsprung mouse model. *Nat Genet* **18**, 60-4.
- 466 **Su, Y., Wen, Z., Shen, Q., Zhang, H., Peng, L., Chen, G., Zhu, Z., Du, C., Xie, H., Li, H. et al.**  
467 (2018). Long non-coding RNA LOC100507600 functions as a competitive endogenous RNA to regulate  
468 BMI1 expression by sponging miR128-1-3p in Hirschsprung's disease. *Cell Cycle* **17**, 459-467.
- 469 **Sun, X. L., Wang, Z. L., Wu, Q., Jin, S. Q., Yao, J. and Cheng, H.** (2019). LncRNA RMST  
470 activates TAK1-mediated NF-kappaB signaling and promotes activation of microglial cells via  
471 competitively binding with hnRNP. *IUBMB Life* **71**, 1785-1793.
- 472 **Tai, F., Gong, K., Song, K., He, Y. and Shi, J.** (2020). Enhanced JunD/RSK3 signalling due to  
473 loss of BRD4/FOXO3/miR-548d-3p axis determines BET inhibition resistance. *Nat Commun* **11**, 258.
- 474 **Tam, P. K.** (2016). Hirschsprung's disease: A bridge for science and surgery. *J Pediatr Surg* **51**, 18-  
475 22.
- 476 **Tang, W., Tang, J., He, J., Zhou, Z., Qin, Y., Qin, J., Li, B., Xu, X., Geng, Q., Jiang, W. et al.**  
477 (2015). SLIT2/ROBO1-miR-218-1-RET/PLAG1: a new disease pathway involved in Hirschsprung's  
478 disease. *J Cell Mol Med* **19**, 1197-207.
- 479 **Wakamatsu, Y., Endo, Y., Osumi, N. and Weston, J. A.** (2004). Multiple roles of Sox2, an HMG-  
480 box transcription factor in avian neural crest development. *Dev Dyn* **229**, 74-86.

481 **Wang, Y., Zhou, J., Wang, Z., Wang, P. and Li, S.** (2017). Upregulation of SOX2 activated  
482 lncRNA PVT1 expression promotes breast cancer cell growth and invasion. *Biochem Biophys Res*  
483 *Commun* **493**, 429-436.

484 **Wang, Z., Yang, B., Zhang, M., Guo, W., Wu, Z., Wang, Y., Jia, L., Li, S., Cancer Genome**  
485 **Atlas Research, N., Xie, W. et al.** (2018). lncRNA Epigenetic Landscape Analysis Identifies EPIC1 as  
486 an Oncogenic lncRNA that Interacts with MYC and Promotes Cell-Cycle Progression in Cancer. *Cancer*  
487 *Cell* **33**, 706-720 e9.

488 **Wester, T. and Granstrom, A. L.** (2017). Hirschsprung disease-Bowel function beyond childhood.  
489 *Semin Pediatr Surg* **26**, 322-327.

490 **Xu, Z., Liu, C., Zhao, Q., Lu, J., Ding, X., Luo, A., He, J., Wang, G., Li, Y., Cai, Z. et al.** (2020).  
491 Long non-coding RNA CCAT2 promotes oncogenesis in triple-negative breast cancer by regulating  
492 stemness of cancer cells. *Pharmacol Res* **152**, 104628.

493 **Zeng, J., Li, Y., Wang, Y., Xie, G., Feng, Q., Yang, Y. and Feng, J.** (2020). lncRNA 00312  
494 Attenuates Cell Proliferation and Invasion and Promotes Apoptosis in Renal Cell Carcinoma via miR-  
495 34a-5p/ASS1 Axis. *Oxid Med Cell Longev* **2020**, 5737289.

496 **Zhao, J., Zhu, Y., Xie, X., Yao, Y., Zhang, J., Zhang, R., Huang, L., Cheng, J., Xia, H., He, J.**  
497 **et al.** (2019). Pleiotropic effect of common PHOX2B variants in Hirschsprung disease and  
498 neuroblastoma. *Aging (Albany NY)* **11**, 1252-1261.

499 **Zhi, Z., Zhu, H., Lv, X., Lu, C., Li, Y., Wu, F., Zhou, L., Li, H. and Tang, W.** (2018). IGF2-  
500 derived miR-483-3p associated with Hirschsprung's disease by targeting FHL1. *J Cell Mol Med* **22**, 4913-  
501 4921.

502  
503  
504  
505  
506

507 **Figures**

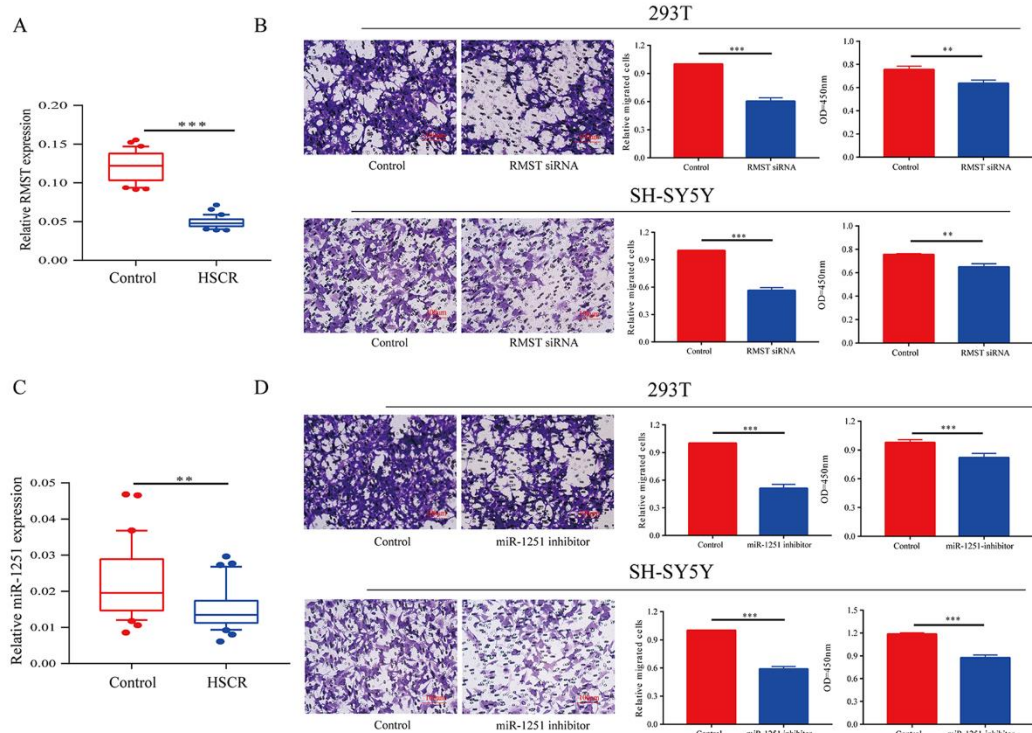

508

509 **Fig. 1 Down-regulation of RMST and miR-1251 in HSCR patients**

510 **A** The expression of RMST was down-regulated obviously in stenosis tracts than  
511 control ones. **B** Transwell and CCK-8 assays showed cell migration and proliferation  
512 were attenuated when RMST was down-regulated. **C** The expression of miR-1251 was  
513 down-regulated obviously in stenosis tracts than control ones. **D** Cell proliferation and  
514 migration were inhibited obviously when transfected with miR-1251 inhibitor.  
515 **\*\*P<0.01, \*\*\*P<0.001**

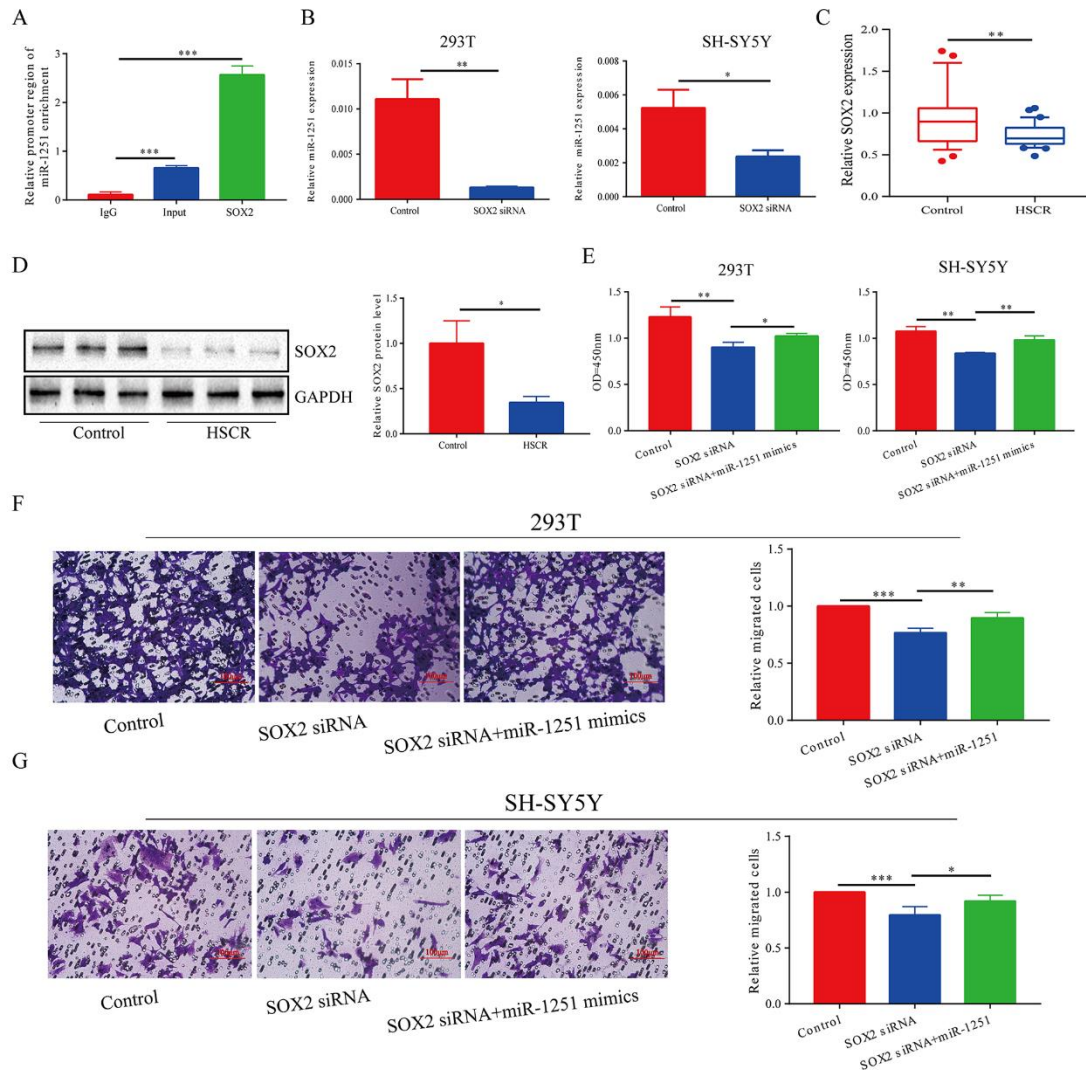

516

517 **Fig. 2 miR-1251 was transcriptionally regulated by SOX2**

518 **A** CHIP assay showed SOX2 could bind to the promoter region of miR-1251. **B** After  
 519 down regulating the expression of SOX2, the expression of miR-1251 was lower than  
 520 control group. **C and D** The mRNA and protein expression of SOX2 in HSCR patients.  
 521 **E-G** When transfected with si-SOX2, cell migration and proliferation were inhibited  
 522 and the up-regulation of miR-1251 could partly reversed it. \* $P < 0.05$ , \*\* $P < 0.01$ ,  
 523 \*\*\* $P < 0.001$

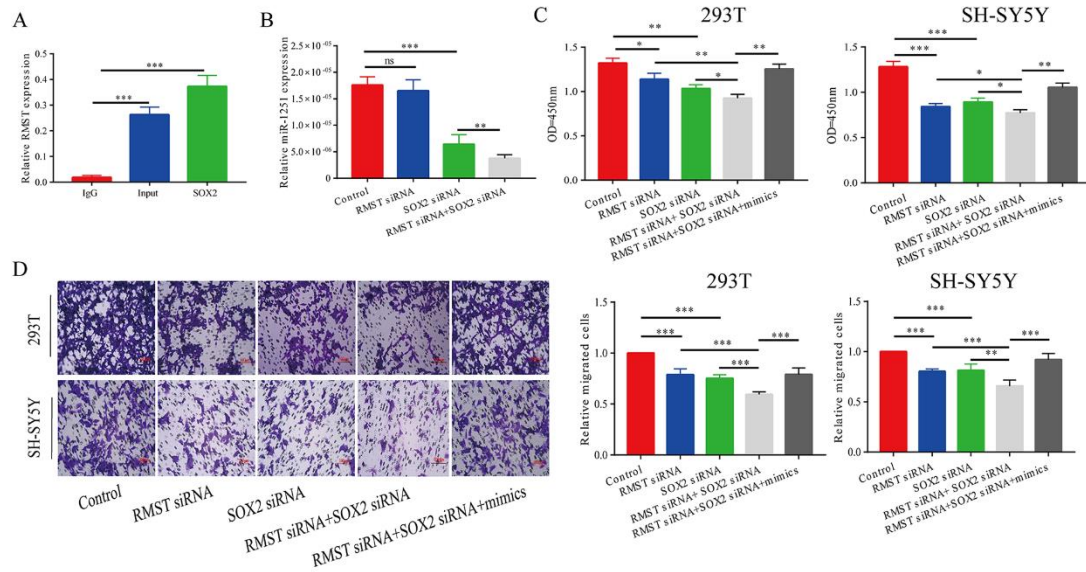

524

525 **Fig. 3 RMST functioned as a co-regulator of SOX2**

526 **A** RIP assay showed RMST could bind to SOX2. **B** RMST functioned as a co-regulator  
 527 of SOX2 and promoted the regulation effect of SOX2 on miR-1251. **C and D** CCK-8  
 528 and Tranwell assays revealed that when the expression of RMST and SOX2 were both  
 529 knockdown, the cell proliferation and migration were more weakened than just down-  
 530 regulated RMST or SOX2 alone. \* $P < 0.05$ , \*\* $P < 0.01$ , \*\*\* $P < 0.001$

531

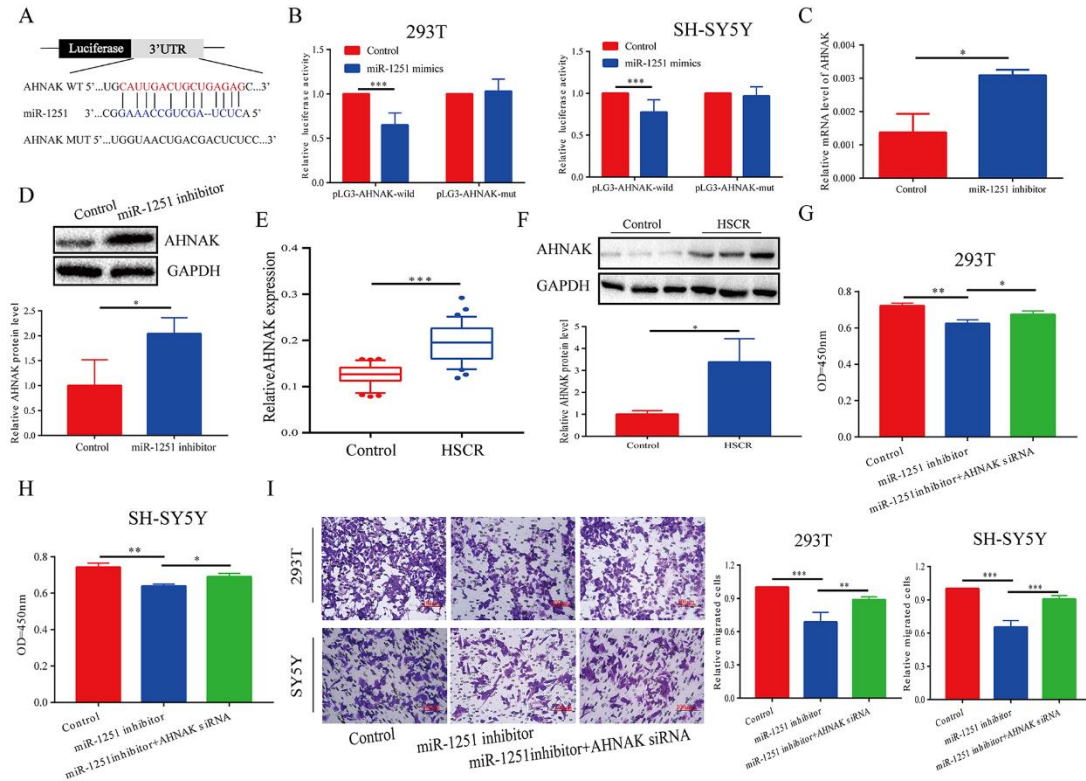

532

533 **Fig. 4 AHNAK was the target gene of miR-1251.**

534 **A** miR-1251 and AHNAK has potential binding sites. **B** Dul-luciferase reporter gene  
 535 assay confirmed the binding relationship between miR-1251 and AHNAK in 293T and  
 536 SY5Y cells. **C and D** When miR-1251 was knocked down, the mRNA and protein level  
 537 of AHNAK was up-regulated. **E and F** The AHNAK mRNA and protein expression  
 538 level in stenosis tracts was higher than control tracts. **G-I** The down-regulation of  
 539 AHNAK could partly reverse the influence of miR-1251 inhibitor on cell migration and  
 540 proliferation. \* $P < 0.05$ , \*\* $P < 0.01$ , \*\*\* $P < 0.001$

541



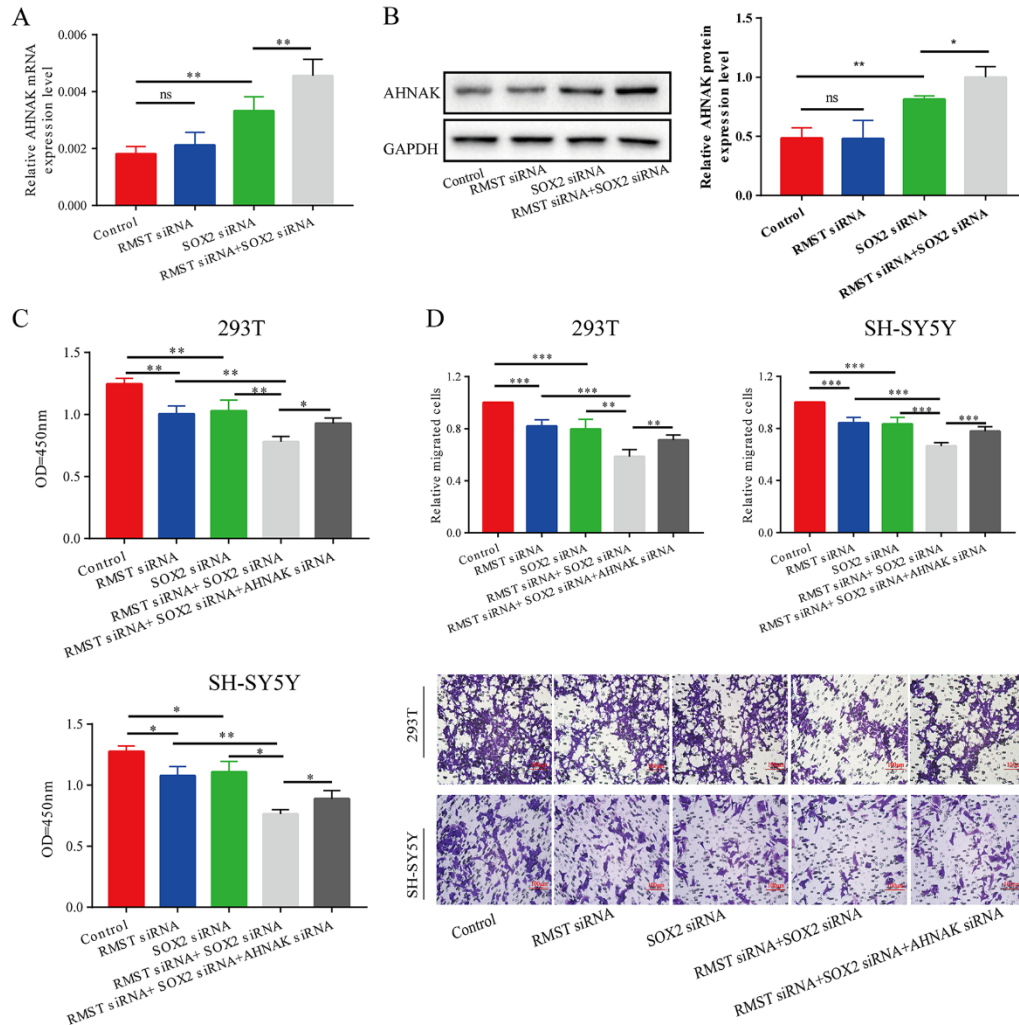

542

543 **Fig. 5 RMST played as a SOX2 transcription co-regulator to inhibit miR-1251 and**  
 544 **raise AHNAK expression**

545 **A and B** The mRNA and protein level of AHNAK in every group. **C and D** CCK-8  
 546 and Transwell assays showed that the combined inhibition of both RMST and SOX2  
 547 low expression on cell proliferation and migration could be partially alleviated by  
 548 simultaneously downregulating the expression of AHNAK. ns  $P \geq 0.05$ , \* $P < 0.05$ ,  
 549 \*\* $P < 0.01$ , \*\*\* $P < 0.001$

550

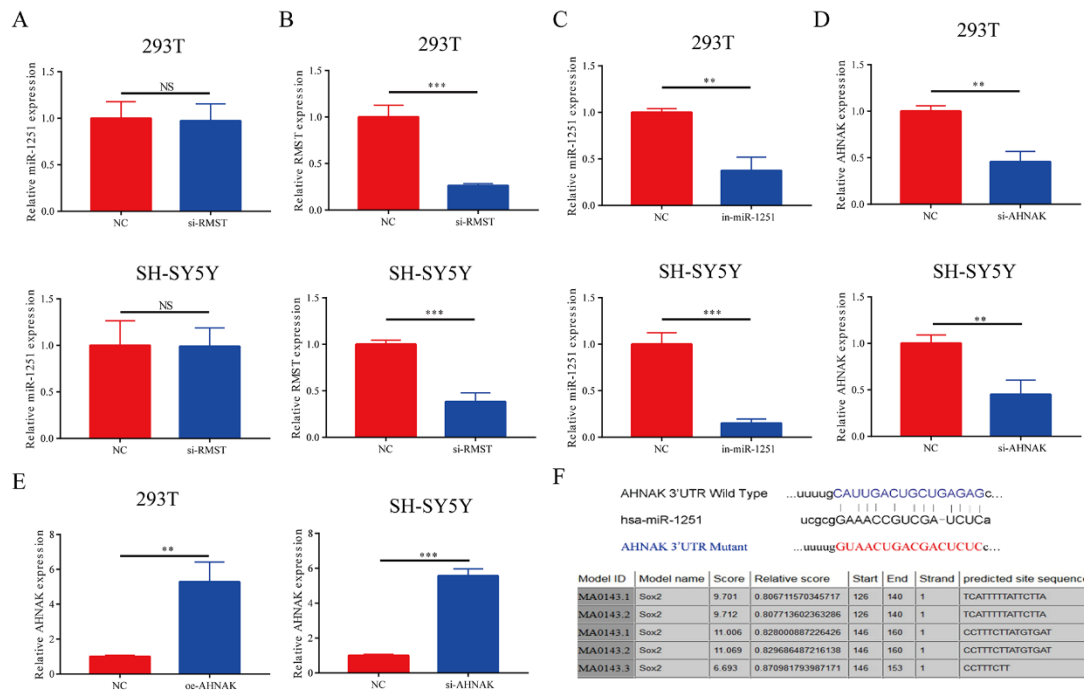

551

552 **Fig. S1. A** The down-regulation of RMST has no significant effect on the expression

553 level of miR-1251 in 293T and SY5Y cells. The transfection efficiency of si-RMST **B**

554 miR-1251 inhibitor **C** si-AHNAK **D** and oe-AHNAK **E** in 293T and SY5Y cells. **F**

555 Bioinformatic analysis predicted the potential target sites between miR-1251 and

556 AHNAK, and SOX2 was predicted to bind with the 2kbp upstream promoter region of

557 miR-1251. ns  $P \geq 0.05$ , \*\* $P < 0.01$ , \*\*\* $P < 0.001$

558

559

560

561 **Table 1. Primer Sequences for Quantitative RT-PCR**

| Target Gene                    | Primer Sequence (5' to 3')                          |
|--------------------------------|-----------------------------------------------------|
| GAPDH                          | F: GCACCGTCAAGGCTGAGAAC                             |
|                                | R: GGATCTCGCTCCTGGAAGATG                            |
| RMST                           | F: ACTTCTGAGTGGTATGCTGCT                            |
|                                | R: GGATGGTGGTTTTGATGTTTC                            |
| SOX2                           | F: TTGCTGCCTCTTTAAGACTAGGA                          |
|                                | R: CTGGGGCTCAAACCTTCTCTC                            |
| AHNAK                          | F: TACCCTTCCTAAGGCTGACATT                           |
|                                | R: TTGGACCCTTGAGTTTTGCAT                            |
| miR-1251                       | F: ACACTCCAGCTGGG ACTCTAGCTGCCAAA                   |
|                                | R: CTCAACTGGTGTCGTGGAGTCGGCAATTCAGTTGAG<br>AGCGCCTT |
| promoter region<br>of miR-1251 | F: TGGACAAGCTGAAGATATGGACA                          |
|                                | R: TGACCTCGATGGCAGTGATG                             |

562

563

564
